# Supplementary material
Source: PubMed Central journal article supplement (PMC2799739)
Supplement: 0906979106_0906979106SI.pdf [file 0906979106_0906979106SI.pdf]

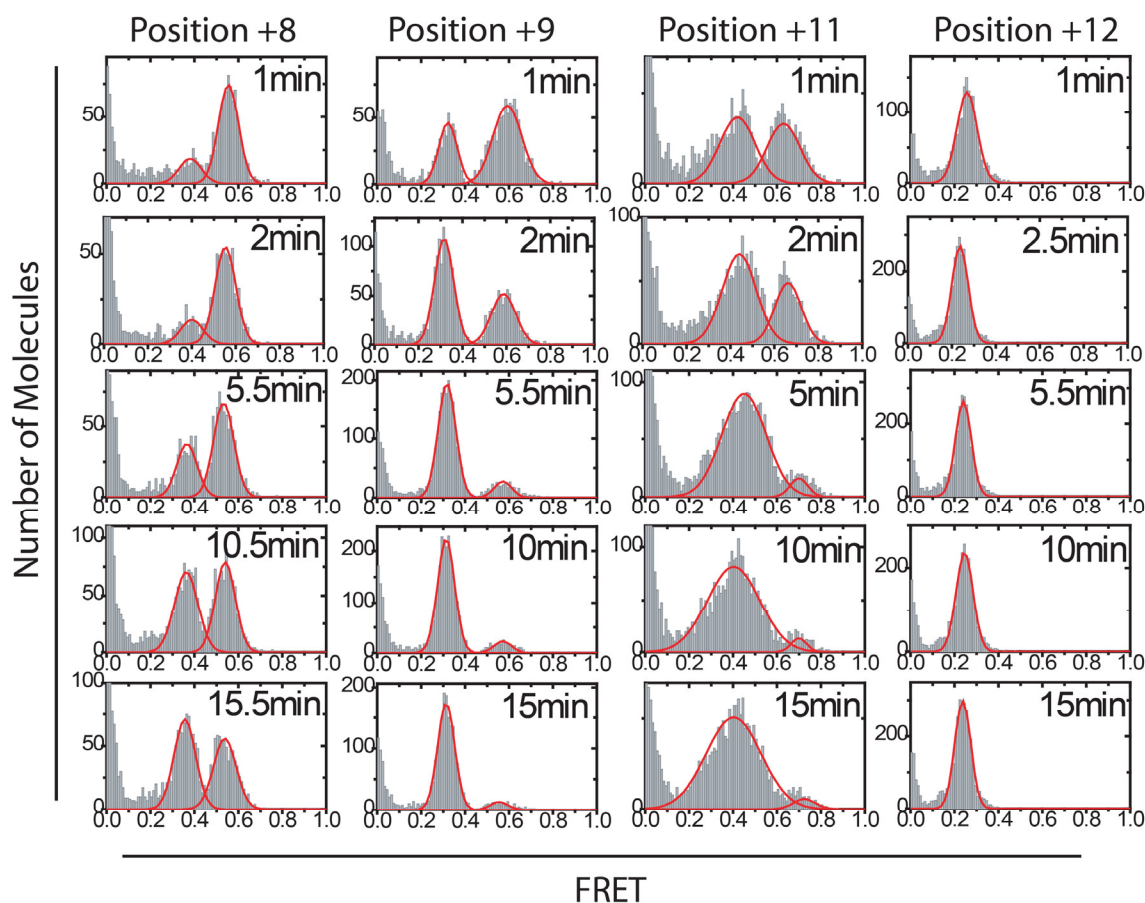

**Fig. S1.** Kinetics of IC-to-EC transition measured by single-molecule FRET. Time-dependent changes in FRET distribution of T7 RNAP-transcribing complexes halted at positions at +8, +9, +11, and +12. Measuring conditions were the same as described in Fig. S2. The x axis of the histograms denotes corrected FRET, and y axis denotes the number of molecules. Data for +8, +9, and +11 were fitted to two Gaussian distributions (smoothed curves), and data for +12 were fitted to a single distribution. The high-FRET IC population slowly converts to a low-FRET EC population. At +12, only EC (FRET  $\approx 0.25$ ) was present all of the time of observation.

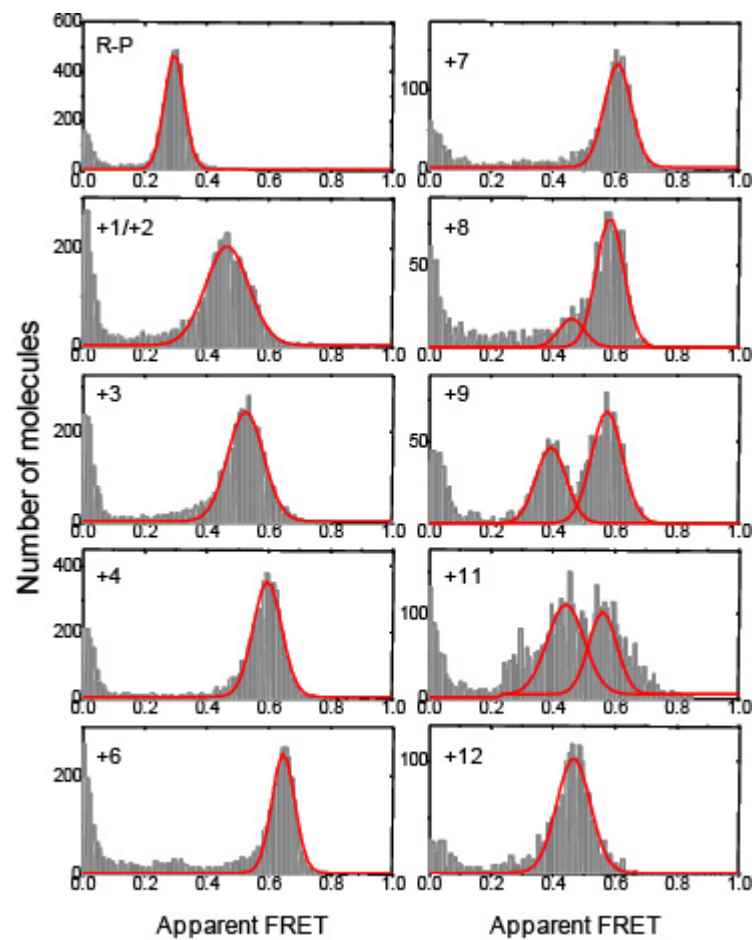

**Fig. S2.** FRET histograms. The x axis shows apparent single-molecule FRET efficiency,  $E_{app}$ . [ $E_{app(inf)} = I_A/(I_D + I_A)$ , without  $\gamma$ -function correction], and the y axis shows observed numbers of transcribing molecules. T7 RNAP transcription was halted at designed positions under limiting NTPs with or without 3' dNTP.



A

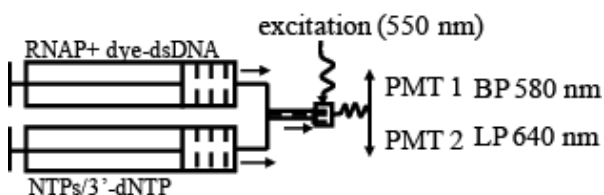

B

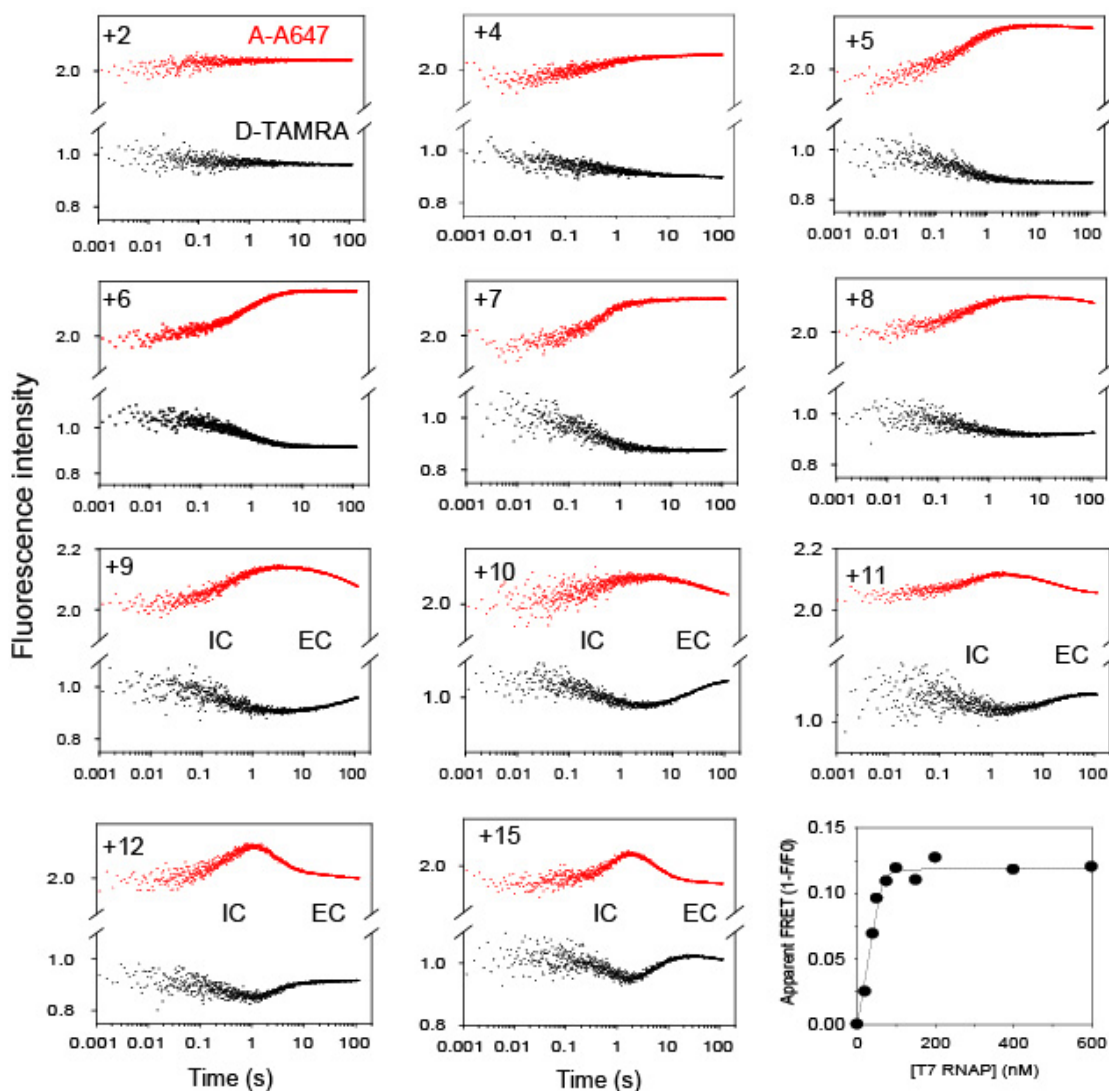

**Fig. S4.** T7 RNAP transcription measured by stopped-flow FRET. (A) A schematic stopped-flow FRET assay of transcription. A preformed mixture of 150 nM RNAP and 100 nM doubly labeled duplex promoter (TAMRA-5'-NT/A647-5'-T; both are final concentrations) (Eqs. s1, s3, s5, or s8) in one syringe of the KinTek stopped-flow setup was rapidly mixed with limiting nucleotides (1 mM GTP or 3' dGTP, 0.4 mM for each of the other NTPs or 3' dNTP, final) at 25 °C. Excitation was set on 550 nm. The donor signal was observed through a 580-nm centered band-pass filter ( $\pm 5$ nm) and the acceptor signal through a 640-nm long-pass filter, both in a log time scale. (B) Real-time traces of the donor (black, lower trace in each graph) and acceptor (red, upper trace in each graph) fluorescence intensities as T7 RNAP transcription was halted on positions indicated. The last graph shows stopped-flow FRET titration of T7 RNAP and promoter DNA in transcription up to +6 by increasing T7 RNAP concentrations in mixtures of 50 nM dye doubly labeled DNA and constant GTP and ATP, yielding  $K_d = 0.8$  nM for the +6 halted transcribing complex. This indicated that the transcribing complex with an increase in RNA/DNA hybrid length became less stable compared with the initial open complex formed with 3' dGTP.



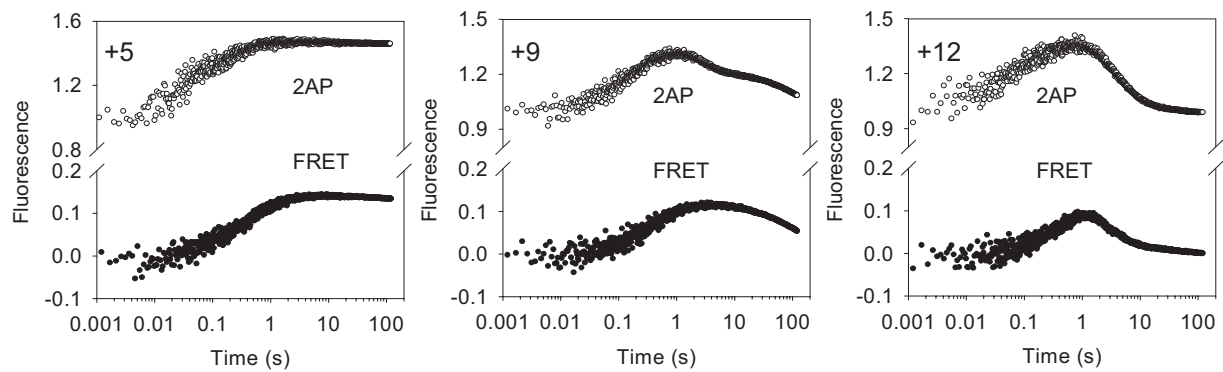

**Fig. S6.** Kinetics of initial bubble reclosure and promoter bending/unbending. Stopped-flow kinetic traces of transcription reactions on the consensus promoter halted on +5, +9, and +12 monitored by 2AP (at -4T) fluorescence changes (upper traces) or FRET (acceptor fluorescence; lower traces) changes. To facilitate comparison, FRET data were modified by using  $I_A/I_{A0} - 1$ , where  $I_A$  and  $I_{A0}$  were acceptor intensities at times  $t$  and 0, respectively.



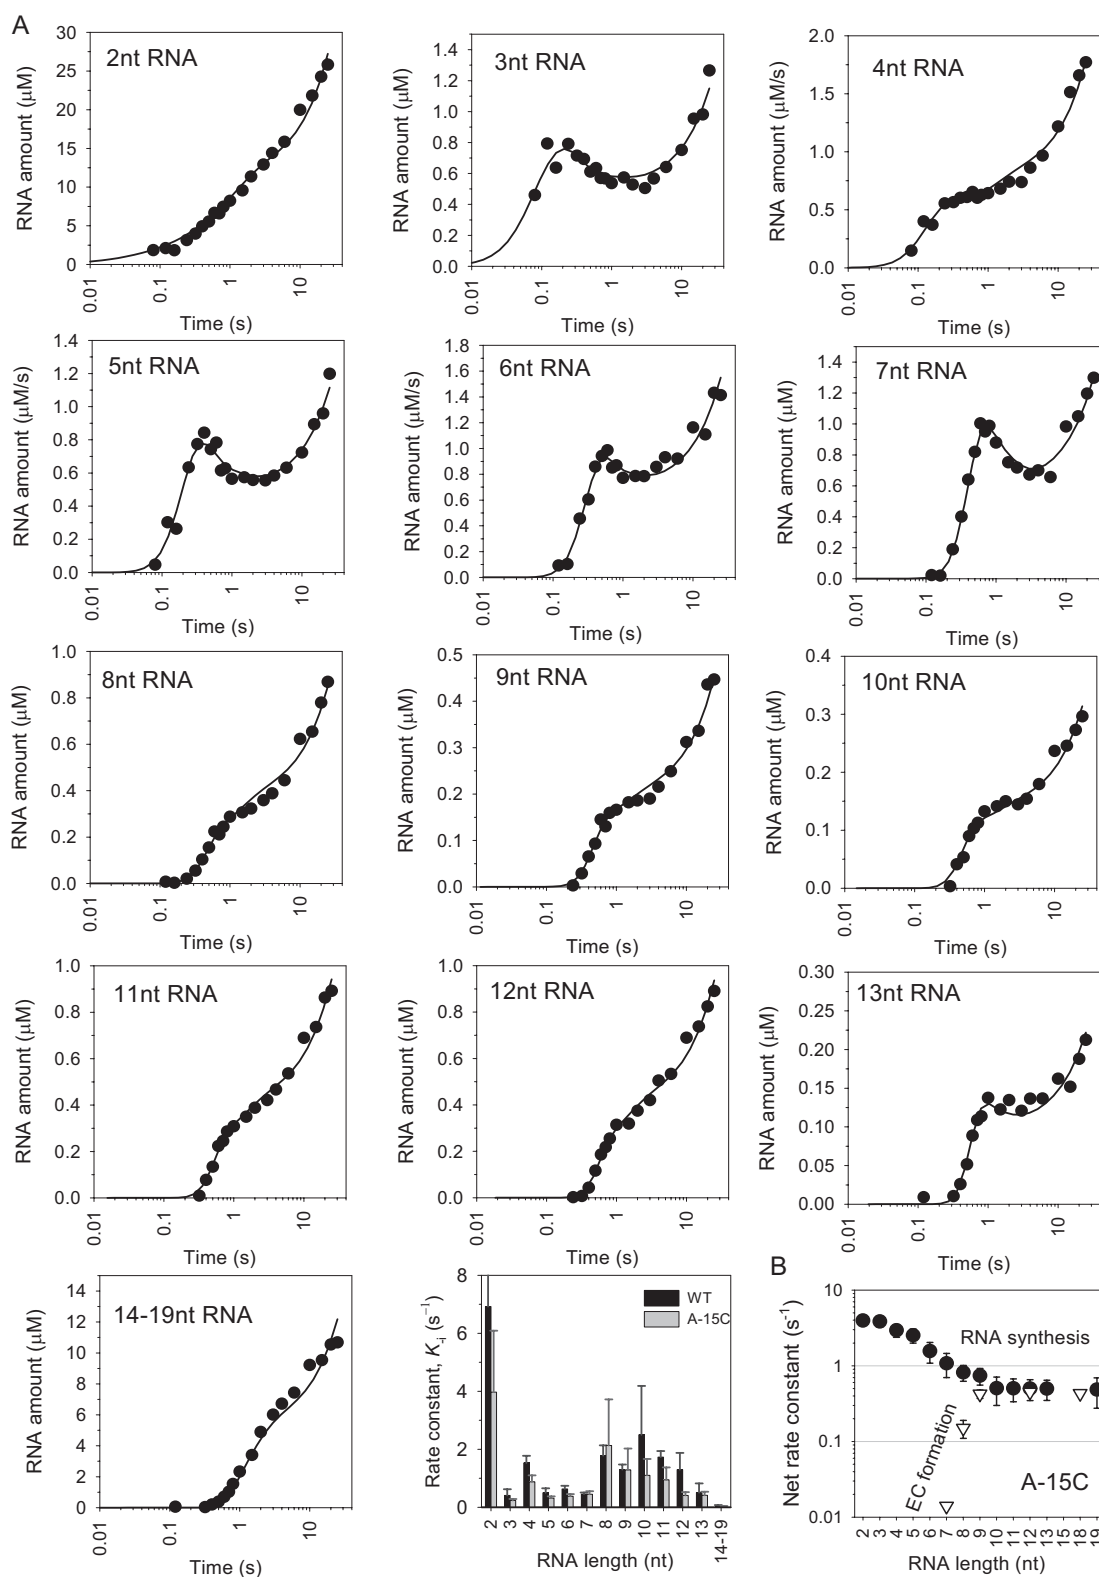

**Fig. 58.** Kinetic analysis of the transcription initiation pathway. (A) The time course of formation and decay of individual RNAs (2, 6, 8, 12, and 19 nt) from data in Fig. 5A. The time courses were globally fit to the transcription model in Fig. 5B by using the Global Kinetic Explorer program (KinTek). The elementary rate constants of nucleotide addition are shown in Fig. 5C, and the last panel shows the elementary dissociation rate constants of 2- to 19-nt RNA from the transcribing complex of the consensus promoter (black bars) and the A-15C promoter variant (gray bars). (B) The net rate constants of RNA syntheses of different lengths (filled circles) and the net rate constants of EC formation (blank triangles) at these translocation steps for the A-15C promoter variant. Error bars represent the range of data from two or more measurements.

**Table S1. Sequences of the T7 promoter nontemplate strands**

| DNA      | 5' to 3' sequence                                                 |    |     |     | Halted positions |
|----------|-------------------------------------------------------------------|----|-----|-----|------------------|
|          | −22                                                               | +1 | +10 | +18 |                  |
| seq1     | TAAATTAATACGACTCACTATAGGGAGACCACAACGGTTT                          |    |     |     | 4,6, 7, 15       |
| seq3     | TAAATTAATACGACTCACTATAGGGAGAGGCCAATGGTTT                          |    |     |     | 4,8, 9,12,13     |
| seq5     | TAAATTAATACGACTCACTATAGGGAGCCCTCAACGGTTT                          |    |     |     | 4,5, 6, 8, 9     |
| seq8     | TAAATTAATACGACTCACTATAGGGAGAGGACATGGTTT                           |    |     |     | 4,9,10,11,12     |
|          | −22                                                               |    |     | +1  |                  |
| SM-NT1   | TGGCGACGGCAGCGAGGCTAAATTAATACGACTCACTATAGGGAGACCACAACGTTATCAGCTTC |    |     |     | 4,6, 7,14,15     |
| SM-NT2   | TGGCGACGGCAGCGAGGCTAAATTAATACGACTCACTATAGGGAGAGGCCATCGTTATCAGCTTC |    |     |     | 4,8, 9,11,12     |
|          | −23                                                               |    |     |     |                  |
| B strand | GCCTCGCTGCCGTCGCCA-biotin                                         |    |     |     |                  |
|          | −22                                                               | +1 | +10 | +19 |                  |
| P22      | TAAATTAATACGACTCACTATAGGGAGACCACAACGGTTTC                         |    |     |     |                  |

A-15C promoter variant: seq1 or seq3 with a base pair change from A:T to C:G at position −15.
